# Supplementary material
Source: MDPI journal article supplement (https://www.mdpi.com/2079-6412/13/6/991)
Supplement: s1 [file s1]

# Supplementary Materials: Structure and Void Connectivity in Nanocolumnar Thin Films Grown by Magnetron Sputtering at Oblique Angles

Rafael Alvarez <sup>1,2,\*</sup>, Guillermo Regodon <sup>1</sup>, Hiedra Acosta-Rivera <sup>1</sup>, Victor Rico <sup>1</sup>, German Alcalá <sup>3</sup>, Agustín R. González-Elípe <sup>1</sup> and Alberto Palmero <sup>1,\*</sup>

<sup>1</sup> Instituto de Ciencia de Materiales de Sevilla, CSIC—Universidad de Sevilla, Américo Vespucio 49, 41092 Seville, Spain

<sup>2</sup> Departamento de Física Aplicada I, Escuela Politécnica Superior, Universidad de Sevilla, c/Virgen de África 7, 41011 Seville, Spain

<sup>3</sup> Departamento de Ingeniería Química y Materiales, Facultad de Ciencias Químicas, Universidad Complutense de Madrid, Avenida Complutense s/n, 28040 Madrid, Spain

\* Correspondence: ralvarezmol@us.es (R.A.); alberto.palmero@csic.es (A.P.)

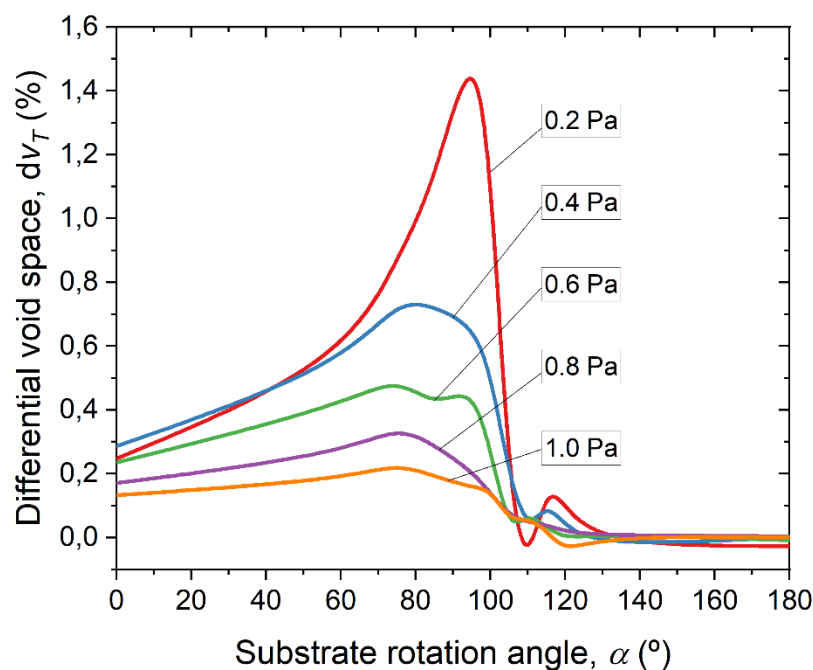

**Figure S1.** Differential void space as a function of the substrate rotation angle and for different values of the gas pressure.
